# Supplementary material for: Species Identification and Antibiotic Resistance Prediction by Analysis of Whole-Genome Sequence Data by Use of ARESdb: an Analysis of Isolates from the Unyvero Lower Respiratory Tract Infection Trial
Source: PubMed Central journal article supplement (PMC7315026; doi:10.1128/jcm.00273-20), 2020-06-24
Supplement: JCM.00273-20-s0001.pdf [file JCM.00273-20-s0001.pdf]

## SUPPLEMENTARY FIGURES AND TABLES

| Sample   | Isolate         | MALDI-TOF               | WGS-taxonomy            |
|----------|-----------------|-------------------------|-------------------------|
| <b>1</b> | <b>AS012628</b> | <i>Pseudomonas</i>      | <i>Stenotrophomonas</i> |
|          | AS012871        | <i>Staphylococcus</i>   | <i>Staphylococcus</i>   |
| <b>2</b> | <b>AS012643</b> | <i>Stenotrophomonas</i> | <i>Pseudomonas</i>      |
|          | AS012644        | <i>Stenotrophomonas</i> | <i>Stenotrophomonas</i> |
| <b>3</b> | <b>AS012483</b> | <i>Klebsiella</i>       | <i>Providencia</i>      |
| <b>4</b> | <b>AS012728</b> | <i>Stenotrophomonas</i> | <i>Pseudomonas</i>      |
|          | AS012789        | <i>Stenotrophomonas</i> | <i>Stenotrophomonas</i> |

Supplementary Table 1: Taxonomic identifications obtained with matrix-assisted laser desorption ionization time-of-flight mass spectrometry (MALDI-TOF) and whole genome sequencing (WGS) for the 4 isolates (bolded) discrepant at the genus level. Additional isolates that resulted from the same original patient samples are listed underneath each discrepant isolate.

| <b>Strain ID</b>                           | <b>Identified By</b> |
|--------------------------------------------|----------------------|
| <i>Acinetobacter baumannii</i>             | WGS & MALDI-TOF      |
| <i>Acinetobacter lactucaae</i>             | WGS                  |
| <i>Acinetobacter nosocomialis</i>          | WGS & MALDI-TOF      |
| <i>Acinetobacter pittii</i>                | WGS & MALDI-TOF      |
| <i>Citrobacter freundii</i>                | WGS & MALDI-TOF      |
| <i>Citrobacter koseri</i>                  | WGS & MALDI-TOF      |
| <i>Citrobacter</i> species<br>FDAARGOS 156 | WGS                  |
| <i>Enterobacter asburiae</i>               | WGS & MALDI-TOF      |
| <i>Enterobacter cloacae</i>                | WGS & MALDI-TOF      |
| <i>Enterobacter hormaechei</i>             | WGS                  |
| <i>Enterobacter kobei</i>                  | MALDI-TOF            |
| <i>Enterobacter xiangfangensis</i>         | WGS                  |
| <i>Escherichia coli</i>                    | WGS & MALDI-TOF      |
| <i>Haemophilus influenzae</i>              | WGS & MALDI-TOF      |
| <i>Klebsiella aerogenes</i>                | WGS & MALDI-TOF      |
| <i>Klebsiella michiganensis</i>            | WGS                  |
| <i>Klebsiella oxytoca</i>                  | WGS & MALDI-TOF      |
| <i>Klebsiella pneumoniae</i>               | WGS & MALDI-TOF      |
| <i>Klebsiella variicola</i>                | WGS & MALDI-TOF      |
| <i>Moraxella catarrhalis</i>               | WGS & MALDI-TOF      |
| <i>Morganella morganii</i>                 | WGS & MALDI-TOF      |
| <i>Proteus mirabilis</i>                   | WGS & MALDI-TOF      |
| <i>Proteus vulgaris</i>                    | MALDI-TOF            |
| <i>Providencia stuartii</i>                | WGS & MALDI-TOF      |
| <i>Pseudomonas aeruginosa</i>              | WGS & MALDI-TOF      |
| <i>Raoultella ornithinolytica</i>          | WGS & MALDI-TOF      |
| <i>Raoultella planticola</i>               | MALDI-TOF            |
| <i>Serratia marcescens</i>                 | WGS & MALDI-TOF      |
| <i>Staphylococcus aureus</i>               | WGS & MALDI-TOF      |
| <i>Stenotrophomonas maltophilia</i>        | WGS & MALDI-TOF      |
| <i>Streptococcus mitis</i>                 | WGS                  |
| <i>Streptococcus pneumoniae</i>            | WGS & MALDI-TOF      |
| <i>Streptococcus salivarius</i>            | WGS & MALDI-TOF      |
| <i>Streptococcus vestibularis</i>          | MALDI-TOF            |

Supplementary Table 2: Species identified by matrix-assisted laser desorption ionization time-of-flight mass spectrometry (MALDI-TOF) or whole genome sequencing (WGS)-based identification or both. If only one method is listed, the other method did not identify the species in any of the isolates.

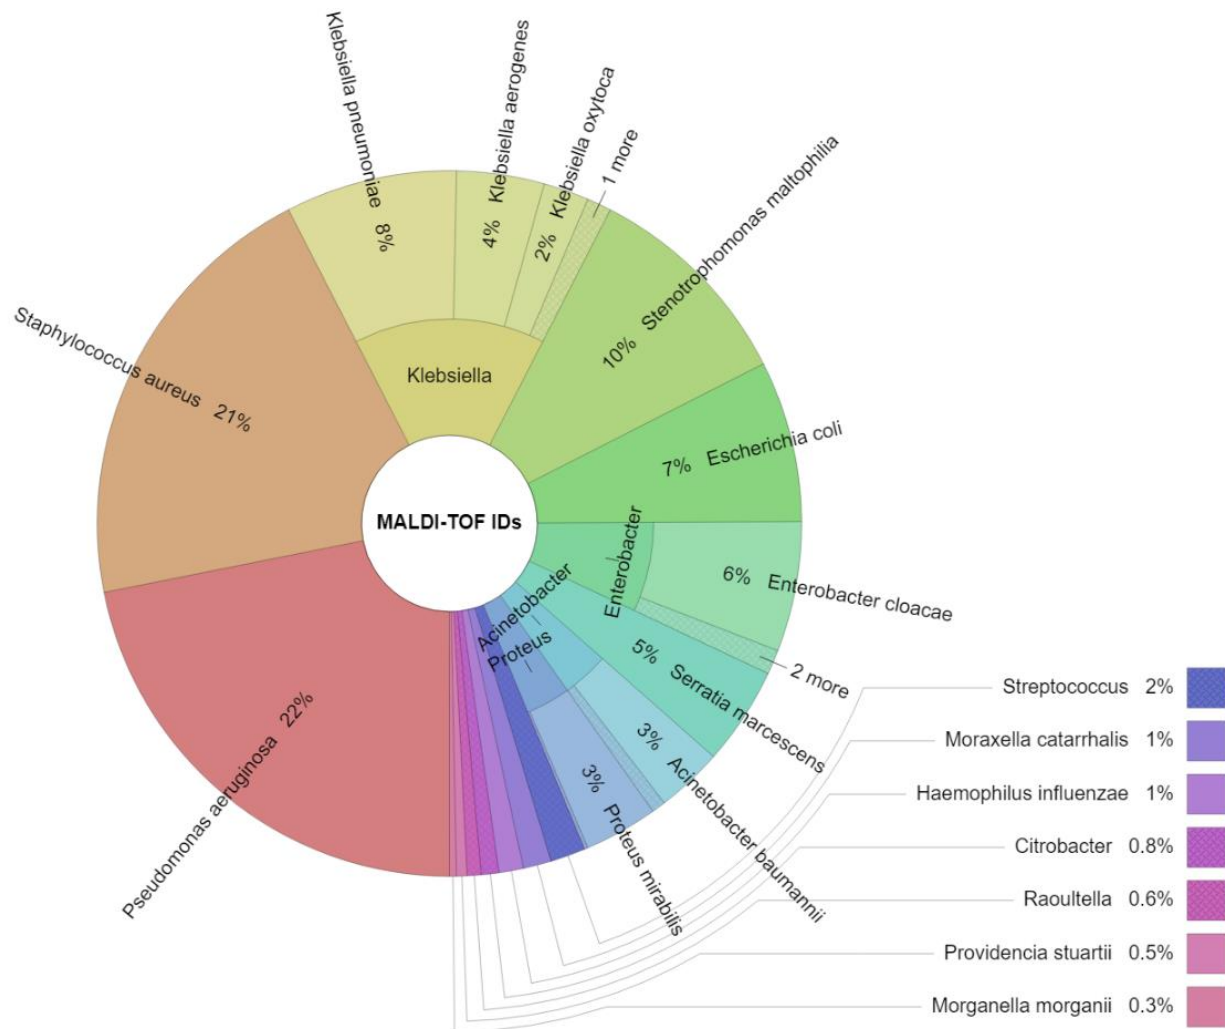

*Supplementary Figure 1: Overview of pathogen identification as determined by matrix-assisted laser desorption ionization time-of-flight mass spectrometry (MALDI-TOF). The pathogen distribution is only reflective of the analyzed data set and not lower respiratory tract infection in general. Grouped species ('2 more') under the genus Enterobacter include Enterobacter kobei and Enterobacter asburiae; grouped species under the genus Acinetobacter include Acinetobacter pittii and Acinetobacter nosocomialis; grouped species under the genus Streptococcus include Streptococcus salivarius, Streptococcus cristatus, Streptococcus species and Streptococcus vestibularis. Collapsed species represent less than 2% of the identifications.*

|                                 |                                    |                                     |            |                                          |            |                                   |            |                              |            |                                  |            |                                 |            |                                  |  |                               |  |                                     |  |                                |  |                                 |  |                                |  |  |  |
|---------------------------------|------------------------------------|-------------------------------------|------------|------------------------------------------|------------|-----------------------------------|------------|------------------------------|------------|----------------------------------|------------|---------------------------------|------------|----------------------------------|--|-------------------------------|--|-------------------------------------|--|--------------------------------|--|---------------------------------|--|--------------------------------|--|--|--|
| Compound                        | <u>Aminoglycosides</u>             |                                     |            |                                          |            |                                   |            |                              |            |                                  |            |                                 |            |                                  |  |                               |  |                                     |  |                                |  |                                 |  |                                |  |  |  |
|                                 | Amikacin                           | 66.7                                | IR         | <b>0.0</b>                               | ND         | ND                                | ND         | ND                           | ND         | 18.2                             | ND         | ND                              | ND         |                                  |  |                               |  |                                     |  |                                |  |                                 |  |                                |  |  |  |
|                                 | Gentamicin                         | 23.5                                | IR         | <b>0.0</b>                               | <b>0.0</b> | 33.3                              | X          | ND                           | <b>0.0</b> | 7.7                              | <b>0.0</b> | X                               | <b>0.0</b> |                                  |  |                               |  |                                     |  |                                |  |                                 |  |                                |  |  |  |
|                                 | Tobramycin                         | 29.4                                | IR         | <b>0.0</b>                               | <b>0.0</b> | ND                                | <b>0.0</b> | ND                           | 33.3       | 15.4                             | ND         | X                               | ND         |                                  |  |                               |  |                                     |  |                                |  |                                 |  |                                |  |  |  |
|                                 | <u>Penicillins</u>                 |                                     |            |                                          |            |                                   |            |                              |            |                                  |            |                                 |            |                                  |  |                               |  |                                     |  |                                |  |                                 |  |                                |  |  |  |
|                                 | Amoxicillin-clavulanic acid        | IR                                  | IR         | 43.8                                     | 66.7       | IR                                | ND         | IR                           | ND         | IR                               | 40.0       | IR                              | IR         |                                  |  |                               |  |                                     |  |                                |  |                                 |  |                                |  |  |  |
|                                 | Ampicillin                         | IR                                  | IR         | IR                                       | 8.8        | IR                                | ND         | IR                           | <b>0.0</b> | IR                               | IR         | IR                              | IR         |                                  |  |                               |  |                                     |  |                                |  |                                 |  |                                |  |  |  |
|                                 | Piperacillin-tazobactam            | 34.4                                | IR         | X                                        | X          | X                                 | X          | X                            | ND         | <b>0.0</b>                       | X          | X                               | ND         |                                  |  |                               |  |                                     |  |                                |  |                                 |  |                                |  |  |  |
|                                 | <u>Cephalosporins</u>              |                                     |            |                                          |            |                                   |            |                              |            |                                  |            |                                 |            |                                  |  |                               |  |                                     |  |                                |  |                                 |  |                                |  |  |  |
|                                 | Cefuroxime                         | IR                                  | IR         | <b>0.0</b>                               | 11.1       | <b>0.0</b>                        | ND         | 26.7                         | 25.0       | IR                               | 50.0       | IR                              | IR         |                                  |  |                               |  |                                     |  |                                |  |                                 |  |                                |  |  |  |
|                                 | Ceftazidime                        | 51.6                                | 13.2       | <b>0.0</b>                               | 14.3       | 40.0                              | 100.0      | 12.5                         | ND         | <b>0.0</b>                       | X          | 50.0                            | <b>0.0</b> |                                  |  |                               |  |                                     |  |                                |  |                                 |  |                                |  |  |  |
|                                 | Ceftriaxone                        | IR                                  | IR         | <b>0.0</b>                               | <b>0.0</b> | 31.2                              | 16.7       | 22.2                         | <b>0.0</b> | ND                               | 20.0       | 100.0                           | 100.0      |                                  |  |                               |  |                                     |  |                                |  |                                 |  |                                |  |  |  |
|                                 | Cefepime                           | 61.9                                | 9.1        | <b>0.0</b>                               | <b>0.0</b> | <b>0.0</b>                        | <b>0.0</b> | ND                           | <b>0.0</b> | <b>0.0</b>                       | ND         | ND                              | ND         |                                  |  |                               |  |                                     |  |                                |  |                                 |  |                                |  |  |  |
|                                 | <u>Fluoroquinolones</u>            |                                     |            |                                          |            |                                   |            |                              |            |                                  |            |                                 |            |                                  |  |                               |  |                                     |  |                                |  |                                 |  |                                |  |  |  |
|                                 | Ciprofloxacin                      | 10.0                                | ND         | 10.0                                     | <b>0.0</b> | 40.0                              | <b>0.0</b> | 50.0                         | <b>0.0</b> | <b>0.0</b>                       | 50.0       | X                               | <b>0.0</b> |                                  |  |                               |  |                                     |  |                                |  |                                 |  |                                |  |  |  |
|                                 | Levofloxacin                       | 21.6                                | 66.7       | 22.2                                     | 6.2        | 50.0                              | <b>0.0</b> | 100.0                        | <b>0.0</b> | <b>0.0</b>                       | <b>0.0</b> | X                               | <b>0.0</b> |                                  |  |                               |  |                                     |  |                                |  |                                 |  |                                |  |  |  |
|                                 | <u>Carbapenems</u>                 |                                     |            |                                          |            |                                   |            |                              |            |                                  |            |                                 |            |                                  |  |                               |  |                                     |  |                                |  |                                 |  |                                |  |  |  |
|                                 | Ertapenem                          | IR                                  | IR         | <b>0.0</b>                               | 100.0      | 80.0                              | 100.0      | 50.0                         | ND         | IR                               | ND         | IR                              | ND         |                                  |  |                               |  |                                     |  |                                |  |                                 |  |                                |  |  |  |
|                                 | Imipenem                           | 22.7                                | IR         | <b>0.0</b>                               | X          | ND                                | 50.0       | <b>0.0</b>                   | 50.0       | <b>0.0</b>                       | ND         | ND                              | 100.0      |                                  |  |                               |  |                                     |  |                                |  |                                 |  |                                |  |  |  |
| Meropenem                       | 21.1                               | IR                                  | <b>0.0</b> | X                                        | ND         | X                                 | ND         | ND                           | <b>0.0</b> | ND                               | ND         | ND                              |            |                                  |  |                               |  |                                     |  |                                |  |                                 |  |                                |  |  |  |
| <u>Folate pathway inhibitor</u> |                                    |                                     |            |                                          |            |                                   |            |                              |            |                                  |            |                                 |            |                                  |  |                               |  |                                     |  |                                |  |                                 |  |                                |  |  |  |
| Trimethoprim-sulfamethoxazole   | ND                                 | 94.4                                | 18.8       | 33.3                                     | 16.7       | 75.0                              | 66.7       | 14.3                         | <b>0.0</b> | X                                | 100.0      | <b>0.0</b>                      |            |                                  |  |                               |  |                                     |  |                                |  |                                 |  |                                |  |  |  |
|                                 |                                    | <i>Pseudomonas aeruginosa</i> (135) |            | <i>Stenotrophomonas maltophilia</i> (60) |            | <i>Klebsiella pneumoniae</i> (48) |            | <i>Escherichia coli</i> (46) |            | <i>Eiterobacter cloacae</i> (37) |            | <i>Serratia marcescens</i> (28) |            | <i>Klebsiella aerogenes</i> (25) |  | <i>Proteus mirabilis</i> (21) |  | <i>Acinetobacter baumannii</i> (19) |  | <i>Klebsiella oxytoca</i> (13) |  | <i>Citrobacter freundii</i> (4) |  | <i>Morganella morganii</i> (2) |  |  |  |
|                                 |                                    | Pathogen                            |            |                                          |            |                                   |            |                              |            |                                  |            |                                 |            |                                  |  |                               |  |                                     |  |                                |  |                                 |  |                                |  |  |  |
| Pathogen                        | <i>Staphylococcus aureus</i> (128) |                                     |            |                                          |            |                                   |            |                              |            |                                  |            |                                 |            |                                  |  |                               |  |                                     |  |                                |  |                                 |  |                                |  |  |  |
|                                 |                                    | 50.0                                | 3.3        | <b>0.0</b>                               | <b>0.0</b> | <b>0.0</b>                        | 37.7       | 40.0                         | 11.1       | 50.0                             |            |                                 |            |                                  |  |                               |  |                                     |  |                                |  |                                 |  |                                |  |  |  |
|                                 |                                    | Gentamicin                          |            |                                          |            |                                   |            |                              |            |                                  |            |                                 |            |                                  |  |                               |  |                                     |  |                                |  |                                 |  |                                |  |  |  |
|                                 |                                    | Benzympenicillin                    |            |                                          |            |                                   |            |                              |            |                                  |            |                                 |            |                                  |  |                               |  |                                     |  |                                |  |                                 |  |                                |  |  |  |
|                                 |                                    | Ciprofloxacin                       |            |                                          |            |                                   |            |                              |            |                                  |            |                                 |            |                                  |  |                               |  |                                     |  |                                |  |                                 |  |                                |  |  |  |
|                                 |                                    | Levofloxacin                        |            |                                          |            |                                   |            |                              |            |                                  |            |                                 |            |                                  |  |                               |  |                                     |  |                                |  |                                 |  |                                |  |  |  |
|                                 |                                    | Moxifloxacin                        |            |                                          |            |                                   |            |                              |            |                                  |            |                                 |            |                                  |  |                               |  |                                     |  |                                |  |                                 |  |                                |  |  |  |
|                                 |                                    | Erythromycin                        |            |                                          |            |                                   |            |                              |            |                                  |            |                                 |            |                                  |  |                               |  |                                     |  |                                |  |                                 |  |                                |  |  |  |
|                                 |                                    | Tetracycline                        |            |                                          |            |                                   |            |                              |            |                                  |            |                                 |            |                                  |  |                               |  |                                     |  |                                |  |                                 |  |                                |  |  |  |
|                                 |                                    | Trimethoprim                        |            |                                          |            |                                   |            |                              |            |                                  |            |                                 |            |                                  |  |                               |  |                                     |  |                                |  |                                 |  |                                |  |  |  |
|                                 | Trimethoprim-sulfamethoxazole      |                                     |            |                                          |            |                                   |            |                              |            |                                  |            |                                 |            |                                  |  |                               |  |                                     |  |                                |  |                                 |  |                                |  |  |  |
|                                 |                                    | Compound                            |            |                                          |            |                                   |            |                              |            |                                  |            |                                 |            |                                  |  |                               |  |                                     |  |                                |  |                                 |  |                                |  |  |  |

Supplementary figure 2: Very major errors (VME) per species-compound pair, with results for Gram-negative bacteria shown on the top and *Staphylococcus aureus* on the bottom. Pairs where species are considered intrinsically resistant to the compound are labelled as “IR”. Species-compound pairs not tested by phenotypic susceptibility testing or without genotypic susceptibility prediction are labelled with “ND”. Species-compound pairs without resistant samples, for which VMEs cannot be calculated are labelled with “X”. Sample counts per species are listed in parentheses. VMEs below 1.5% are bolded.

| Compound                      | Pathogen                           | Major error (ME) rates per species-compound pair |                                     |                                          |                                   |                              |                                  |                                 |                                  |                               |                                     |                                |                                 |                                |
|-------------------------------|------------------------------------|--------------------------------------------------|-------------------------------------|------------------------------------------|-----------------------------------|------------------------------|----------------------------------|---------------------------------|----------------------------------|-------------------------------|-------------------------------------|--------------------------------|---------------------------------|--------------------------------|
|                               |                                    | 0.8                                              | IR                                  | 0.0                                      | ND                                | ND                           | ND                               | ND                              | 0.0                              | ND                            | ND                                  | ND                             |                                 |                                |
| Aminoglycosides               | Amikacin                           | <b>0.8</b>                                       | IR                                  | <b>0.0</b>                               | ND                                | ND                           | ND                               | ND                              | <b>0.0</b>                       | ND                            | ND                                  | ND                             |                                 |                                |
|                               | Gentamicin                         | 5.1                                              | IR                                  | <b>0.0</b>                               | <b>0.0</b>                        | <b>0.0</b>                   | 7.1                              | ND                              | 5.6                              | 16.7                          | <b>0.0</b>                          | <b>0.0</b>                     |                                 |                                |
|                               | Tobramycin                         | 4.2                                              | IR                                  | <b>2.5</b>                               | 7.0                               | ND                           | 3.8                              | ND                              | <b>0.0</b>                       | <b>0.0</b>                    | ND                                  | 25.0                           |                                 |                                |
| Penicillins                   | Amoxicillin-clavulanic acid        | IR                                               | IR                                  | 3.1                                      | <b>0.0</b>                        | IR                           | ND                               | IR                              | ND                               | IR                            | <b>0.0</b>                          | IR                             |                                 |                                |
|                               | Ampicillin                         | IR                                               | IR                                  | IR                                       | 8.3                               | IR                           | ND                               | IR                              | <b>0.0</b>                       | IR                            | IR                                  | IR                             |                                 |                                |
| Cephalosporins                | Piperacillin-tazobactam            | 20.4                                             | IR                                  | 16.7                                     | <b>0.0</b>                        | 21.6                         | 3.6                              | 12.0                            | ND                               | <b>0.0</b>                    | 38.5                                | 25.0                           |                                 |                                |
|                               | Cefuroxime                         | IR                                               | IR                                  | 15.8                                     | <b>0.0</b>                        | 76.9                         | ND                               | 60.0                            | 11.8                             | IR                            | 14.3                                | IR                             |                                 |                                |
| Fluoroquinolones              | Ceftazidime                        | 10.6                                             | 22.7                                | <b>0.0</b>                               | 5.1                               | 22.7                         | <b>0.0</b>                       | 47.1                            | ND                               | <b>0.0</b>                    | 7.7                                 | <b>0.0</b>                     |                                 |                                |
|                               | Ceftriaxone                        | IR                                               | IR                                  | <b>0.0</b>                               | <b>0.0</b>                        | 33.3                         | <b>0.0</b>                       | 50.0                            | 5.6                              | ND                            | <b>0.0</b>                          | <b>0.0</b>                     |                                 |                                |
|                               | Cefepime                           | 14.0                                             | 40.0                                | <b>2.5</b>                               | <b>2.4</b>                        | 5.6                          | <b>0.0</b>                       | ND                              | 10.5                             | 37.5                          | ND                                  | ND                             |                                 |                                |
| Carbapenems                   | Ciprofloxacin                      | 9.5                                              | ND                                  | 5.3                                      | <b>0.0</b>                        | <b>0.0</b>                   | 16.0                             | 4.3                             | <b>0.0</b>                       | <b>0.0</b>                    | <b>0.0</b>                          | X                              |                                 |                                |
|                               | Levofloxacin                       | 10.7                                             | 8.3                                 | <b>0.0</b>                               | <b>0.0</b>                        | 6.1                          | 7.7                              | 8.3                             | <b>0.0</b>                       | <b>0.0</b>                    | <b>0.0</b>                          | X                              |                                 |                                |
| Folate pathway inhibitor      | Ertapenem                          | IR                                               | IR                                  | 8.7                                      | <b>2.3</b>                        | 6.2                          | <b>0.0</b>                       | 47.6                            | ND                               | IR                            | ND                                  | IR                             |                                 |                                |
|                               | Imipenem                           | 15.4                                             | IR                                  | <b>0.0</b>                               | <b>0.0</b>                        | ND                           | 3.8                              | <b>0.0</b>                      | 41.2                             | <b>0.0</b>                    | ND                                  | ND                             |                                 |                                |
|                               | Meropenem                          | 21.6                                             | IR                                  | 15.2                                     | 4.3                               | ND                           | <b>0.0</b>                       | ND                              | ND                               | <b>0.0</b>                    | ND                                  | ND                             |                                 |                                |
| Trimethoprim-sulfamethoxazole | ND                                 | <b>2.4</b>                                       | <b>0.0</b>                          | 3.6                                      | <b>0.0</b>                        | <b>0.0</b>                   | 4.5                              | <b>0.0</b>                      | 20.0                             | 15.4                          | <b>0.0</b>                          | X                              |                                 |                                |
|                               |                                    |                                                  | <i>Pseudomonas aeruginosa</i> (135) | <i>Stenotrophomonas maltophilia</i> (60) | <i>Klebsiella pneumoniae</i> (48) | <i>Escherichia coli</i> (46) | <i>Enterobacter cloacae</i> (37) | <i>Serratia marcescens</i> (28) | <i>Klebsiella aerogenes</i> (25) | <i>Proteus mirabilis</i> (21) | <i>Acinetobacter baumannii</i> (19) | <i>Klebsiella oxytoca</i> (13) | <i>Citrobacter freundii</i> (4) | <i>Morganella morganii</i> (2) |
|                               |                                    |                                                  | Pathogen                            |                                          |                                   |                              |                                  |                                 |                                  |                               |                                     |                                |                                 |                                |
|                               | <i>Staphylococcus aureus</i> (128) | <b>0.0</b>                                       | 11.8                                | <b>1.8</b>                               | 5.3                               | 5.2                          | 10.0                             | 8.1                             | <b>0.8</b>                       | 22.5                          |                                     |                                |                                 |                                |
|                               |                                    |                                                  | Gentamicin                          | Benzylpenicillin                         | Ciprofloxacin                     | Levofloxacin                 | Moxifloxacin                     | Erythromycin                    | Tetracycline                     | Trimethoprim                  | Trimethoprim-sulfamethoxazole       |                                |                                 |                                |
|                               |                                    |                                                  | Compound                            |                                          |                                   |                              |                                  |                                 |                                  |                               |                                     |                                |                                 |                                |

Supplementary figure 3: Major error (ME) rates per species-compound pair, with results for Gram-negative bacteria shown on the top and those for *Staphylococcus aureus* on the bottom. Pairs where species are considered intrinsically resistant to the compound are labelled as “IR”. Species-compound pairs not tested by phenotypic susceptibility testing or without genotypic susceptibility prediction are labelled with “ND”. Species-compound pairs without susceptible samples for which MEs cannot be calculated are labelled with “X”. Sample counts per species are listed in parentheses. MEs below 3.5% are bolded.
